# Supplementary material for: Alleviation effects of Lactobacillus plantarum in colitis aggravated by a high-salt diet depend on intestinal barrier protection, NF-κB pathway regulation, and oxidative stress improvement
Source: Royal Society of Chemistry journal article supplement (doi:10.1039/d4fo06377e), 2025-01-01
Supplement: d4fo06377e1.pdf [file d4fo06377e1.pdf]

**Table S1** Calculated disease activity index (DAI) score.

| <b>Score</b> | <b>Weight loss (%)</b> | <b>Stool consistency</b>   | <b>Blood in feces</b>       |
|--------------|------------------------|----------------------------|-----------------------------|
| 0            | None                   | Normal                     | Negative (no bleeding)      |
| 1            | 1.0-5.0                | Loose stools               | Negative                    |
| 2            | 5.0-10.0               | Loose stools               | Hemoccult positive (slight) |
| 3            | 10.0-15.0              | Diarrhea (slight)          | Hemoccult positive          |
| 4            | Over 15.0              | Diarrhea (Watery diarrhea) | Gross bleeding              |

<sup>a</sup>Disease activity index is a summation of the three parameters weight loss, stool consistency, and hematochezia. <sup>b</sup>Normal stool: well-shaped stool; loose stool: unformed pasty stool that does not stick to the anus; diarrhea: liquid stool that is attached to the anus.

**Table S2** Standard for evaluation of histological injury.

| <b>In<br/>ammation</b> | <b>Mucosal injury</b>    | <b>Crypt distortion</b>                             | <b>Area of lesions<br/>(%)</b> | <b>Score</b> |
|------------------------|--------------------------|-----------------------------------------------------|--------------------------------|--------------|
| None                   | None                     | None                                                | None                           | 0            |
| Mild                   | Mucous layer             | 1/3                                                 | 1–25                           | 1            |
| Moderate               | Submucosa                | 2/3                                                 | 26–50                          | 2            |
| Severe                 | Muscularis and<br>serosa | 100%                                                | 26–50                          | 3            |
| —                      | —                        | Entire crypt and<br>surface epithelium<br>destroyed | 76–100                         | 4            |

**Table S3** Comparison table of abbreviations.

| <b>Full name</b>                   | <b>Abbreviation</b> |
|------------------------------------|---------------------|
| A high-salt diet                   | HSD                 |
| Inflammatory bowel disease         | IBD                 |
| Ulcerative colitis                 | UC                  |
| Crohn's disease                    | CD                  |
| Disease activity index             | DAI                 |
| Hematoxylin and eosin              | H&E                 |
| Myeloperoxidase                    | MPO                 |
| Cyclooxygenase-2                   | COX-2               |
| Inducible nitric oxide synthase    | iNOS                |
| Immunohistochemical                | IHC                 |
| Periodic acid-schiff               | PAS                 |
| Tight junction                     | TJ                  |
| Transmission electron microscopy   | TEM                 |
| 4', 6-diamidino-2-phenylindole     | DAPI                |
| Diamine oxidase                    | DAO                 |
| Immunofluorescence                 | IF                  |
| Bicinchoninic acid                 | BCA                 |
| Malonic dialdehyde                 | MDA                 |
| Superoxide dismutase               | SOD                 |
| Catalase                           | CAT                 |
| Glutathione peroxidase             | GSH-PX              |
| Short-chain fatty acids            | SCFAs               |
| Principal coordinate analysis      | PCoA                |
| Butyrate-rich polymer nanoparticle | PSBA                |
